# Supplementary material for: Rates of Extreme Neonatal Hyperbilirubinemia and Kernicterus in Children and Adherence to National Guidelines for Screening, Diagnosis, and Treatment in Sweden
Source: PubMed Central journal article supplement (PMC6583272; doi:10.1001/jamanetworkopen.2019.0858), 2019-03-22

## Supplementary Online Content

Alkén J, Håkansson S, Ekéus C, Gustafson P, Norman M. Rates of extreme neonatal hyperbilirubinemia and kernicterus in children and adherence to national guidelines for screening, diagnosis, and treatment in Sweden. *JAMA Netw Open*. 2019;2(3):e190858. doi:10.1001/jamanetworkopen.2019.0858

**eFigure.** Bilirubin chart used in Sweden as a basis for decision-making in near-term and term infants.

This supplementary material has been provided by the authors to give readers additional information about their work.

**eFigure.** Bilirubin chart used in Sweden as a basis for decision-making in near-term and term infants.

Bilirubin chart  
Newborns  $\geq 35$  wks GA

| GA, weeks+days | Suggested treatment limits |                      |
|----------------|----------------------------|----------------------|
|                | Phototherapy               | X-change transfusion |
| 35+0 – 36+6    | 300                        | 380                  |
| $\geq 37+0$    | 350                        | 425                  |

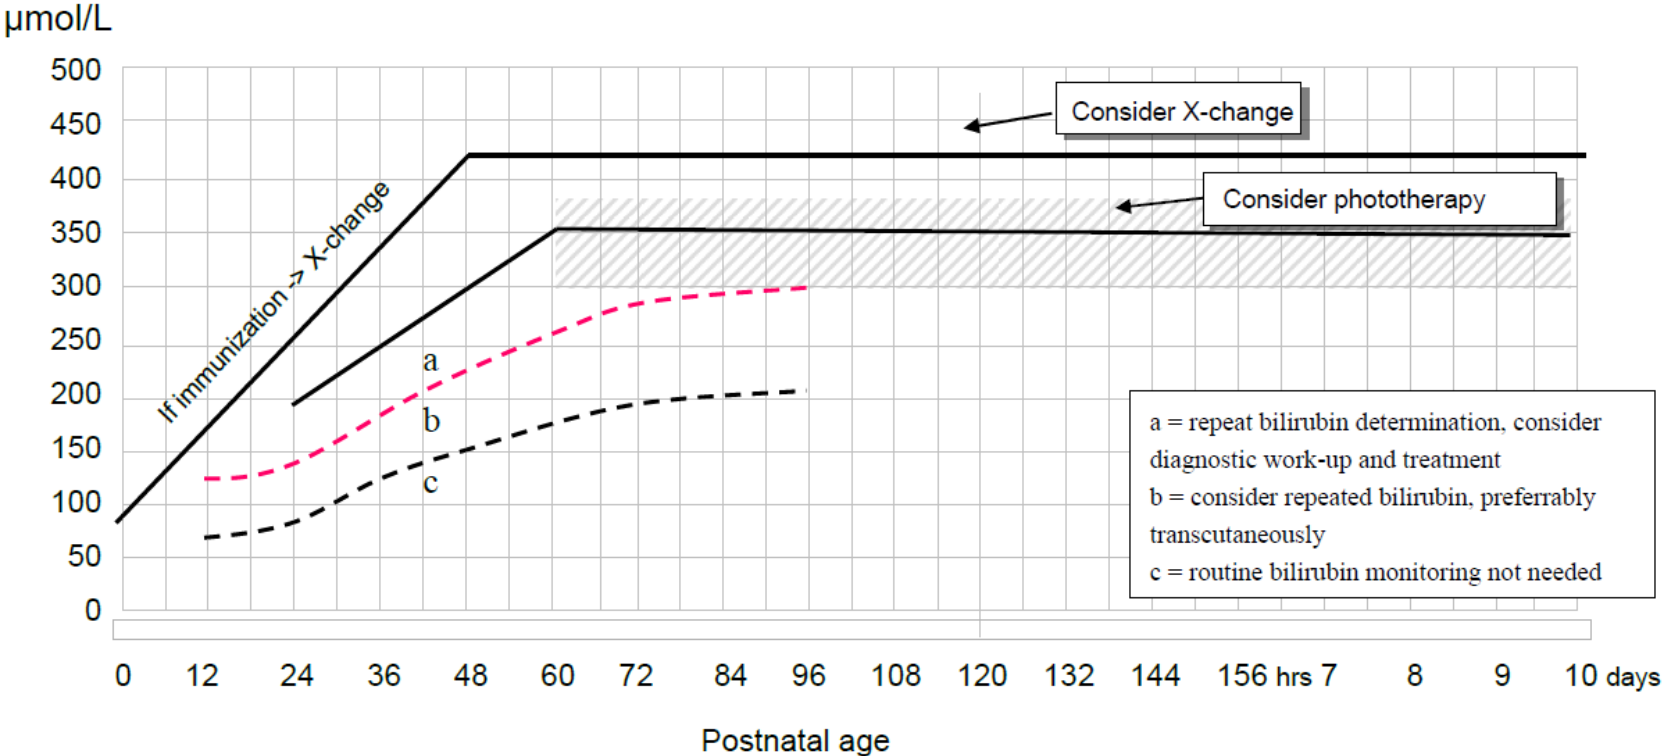

Supplement: jamanetwopen-2-e190858-s001.pdf [file jamanetwopen-2-e190858-s001.pdf]
